# Supplementary material
Source: publisher site journal article supplement (https://www.dovepress.com/article/387253)
Supplement: Supplementary file 1 [file get_supplementary_file.php]

**Supplementary Appendix**

**Table S1: Cohort Construction Flowchart for the Training and Initial Validation Sets (Medicare) and the External Validation Set (Medicaid)**

| **Step** | **Number of Patients in the Medicare population** | **Number of Patients in the Medicaid population** |
| --- | --- | --- |
| Patients with diagnosis of cirrhosis at any timeA | 57,832 | 7164 |
| Patients with available laboratory data for MELD calculationB | 32,051 | 5001 |
| Patients with >=6 months medical insurance enrollment | 13,722 | 3684 |
| Requiring the diagnosis of cirrhosis to be in the 90 days before or after the date of MELD calculation date | 8,466 | 2303 |
| Patients not missing age data | 8,466 | 2299 |
| Patients not missing gender data | 8,466 | 2285 |
| Patients >=65 years old | 6,936 | 2240 |

Abbreviations: MELD, model for end-stage liver disease

A Cirrhosis was defined by at least 1 inpatient or outpatient claims code for cirrhosis during the covariate assessment period (CAP), as defined in the Methods.

B All patients were required to have all 3 of the following laboratory values available within 4 weeks of one another: serum creatinine, total bilirubin, and international normalized ratio (INR), for calculation of MELD score. For details, see Methods.

**Table S2: Hosmer-Lemeshow Goodness of Fit Tables, MELD cut-off <10**

| Deciles by predicted MELD | Medicare | | | | | | Medicaid | | |
| --- | --- | --- | --- | --- | --- | --- | --- | --- | --- |
| MELD Score <10 in the training set | | | MELD Score <10 in the internal validation set | | | MELD Score <10 in the external validation set | | |
| N. of patients | Observed N. Events | Expected N. Events | N. of patients | Observed N. Events | Expected N. Events | N. of patients | Observed N. Events | Expected N. Events |
| 1 | 450 | 2 | 3.52 | 244 | 4 | 4.18 | 224 | 7 | 5.86 |
| 2 | 450 | 31 | 22.09 | 244 | 28 | 23.19 | 224 | 52 | 35.10 |
| 3 | 450 | 74 | 60.77 | 244 | 56 | 56.01 | 224 | 59 | 65.57 |
| 4 | 450 | 111 | 116.45 | 244 | 92 | 88.12 | 224 | 82 | 91.28 |
| 5 | 450 | 170 | 183.76 | 244 | 109 | 121.78 | 224 | 96 | 111.20 |
| 6 | 450 | 224 | 252.29 | 244 | 139 | 152.60 | 224 | 116 | 126.56 |
| 7 | 450 | 294 | 302.51 | 244 | 186 | 175.32 | 224 | 144 | 139.17 |
| 8 | 450 | 351 | 337.30 | 244 | 201 | 189.66 | 224 | 148 | 150.08 |
| 9 | 450 | 378 | 361.74 | 244 | 197 | 200.27 | 224 | 168 | 162.37 |
| 10 | 451 | 397 | 391.56 | 239 | 208 | 208.88 | 224 | 194 | 178.83 |

Abbreviations: MELD, model for end-stage liver disease; N, number

**Table S3: Hosmer-Lemeshow Goodness of Fit Tables, MELD cut-off >=15**

| Deciles by predicted MELD | Medicare | | | | | | Medicaid | | |
| --- | --- | --- | --- | --- | --- | --- | --- | --- | --- |
| MELD Score >=15 in the training set | | | MELD Score >=15 in the internal validation set | | | MELD Score >=15 in the external validation set | | |
| N. of patients | Observed N. Events | Expected N. Events | N. of patients | Observed N. Events | Expected N. Events | N. of patients | Observed N. Events | Expected N. Events |
| 1 | 450 | 5 | 8.28 | 244 | 1 | 4.88 | 224 | 3 | 9.32 |
| 2 | 450 | 7 | 13.61 | 244 | 4 | 7.58 | 224 | 8 | 13.98 |
| 3 | 450 | 13 | 18.94 | 244 | 9 | 10.11 | 224 | 16 | 18.09 |
| 4 | 450 | 31 | 28.03 | 244 | 12 | 14.12 | 224 | 17 | 22.26 |
| 5 | 450 | 44 | 45.31 | 244 | 26 | 21.89 | 224 | 33 | 27.79 |
| 6 | 450 | 93 | 81.15 | 245 | 43 | 36.66 | 224 | 43 | 35.81 |
| 7 | 450 | 154 | 142.72 | 244 | 71 | 60.46 | 224 | 56 | 49.09 |
| 8 | 450 | 245 | 237.94 | 244 | 96 | 99.17 | 224 | 90 | 73.18 |
| 9 | 450 | 336 | 354.69 | 244 | 167 | 167.57 | 224 | 108 | 120.41 |
| 10 | 451 | 438 | 435.33 | 238 | 217 | 223.58 | 224 | 198 | 202.06 |

Abbreviations: MELD, model for end-stage liver disease; N, number

**Table S4: Hosmer-Lemeshow Goodness of Fit Tables, MELD cut-off >=20**

| Deciles by predicted MELD | Medicare | | | | | | Medicaid | | |
| --- | --- | --- | --- | --- | --- | --- | --- | --- | --- |
| MELD Score >=20 in the training set | | | MELD Score >=20 in the internal validation set | | | MELD Score >=20 in the external validation set | | |
| N. of patients | Observed N. Events | Expected N. Events | N. of patients | Observed N. Events | Expected N. Events | N. of patients | Observed N. Events | Expected N. Events |
| 1 | 450 | 0 | 2.80 | 246 | 1 | 8.71 | 215 | 1 | 11.97 |
| 2 | 450 | 1 | 4.52 | 245 | 0 | 8.83 | 224 | 1 | 12.68 |
| 3 | 450 | 7 | 6.25 | 245 | 1 | 9.01 | 223 | 4 | 12.82 |
| 4 | 450 | 5 | 8.66 | 244 | 4 | 9.23 | 220 | 6 | 12.88 |
| 5 | 450 | 10 | 12.83 | 244 | 3 | 9.73 | 225 | 10 | 13.42 |
| 6 | 450 | 17 | 23.25 | 244 | 8 | 10.84 | 224 | 10 | 13.73 |
| 7 | 450 | 41 | 42.30 | 244 | 23 | 13.37 | 224 | 14 | 14.33 |
| 8 | 450 | 94 | 78.65 | 244 | 43 | 20.99 | 224 | 28 | 15.64 |
| 9 | 450 | 198 | 178.33 | 244 | 96 | 76.84 | 224 | 43 | 21.66 |
| 10 | 451 | 359 | 374.42 | 235 | 185 | 196.45 | 237 | 145 | 132.88 |

Abbreviations: MELD, model for end-stage liver disease; N, number

**Table S5: Selected Variables and Coefficients for Predicting Continuous MELD Score*:**

| **Parameter** | **Coefficient (S.E.)** | **P value** |
| --- | --- | --- |
| Intercept | 9.193 (0.386) | <.0001 |
| Abdominal ultrasound | 0.332 (0.136) | 0.015 |
| Angiotensin converting enzyme (ACE) inhibitors | -0.587 (0.146) | <.0001 |
| Acute kidney injury | 1.522 (0.172) | <.0001 |
| Acute liver failure | 1.068 (0.375) | 0.004 |
| Atrial fibrillation | 0.743 (0.176) | <.0001 |
| **Medicare age categories:** |  |  |
| Age category: >=90 | -0.237 (0.402) | 0.554 |
| Age category: 85-89 | -0.038 (0.283) | 0.465 |
| Age category: 80-84 | 0.126 (0.236) | 0.333 |
| Age category: 75-79 | 0.138 (0.207) | 0.353 |
| Age category: 70-74 | 0.052 (0.179) | 0.629 |
| Age category: 65-69 | 0 (reference) | -- |
| Alcohol liver disease | 0.893 (0.232) | 0.000 |
| Alpha-1 antitrypsin | 1.797 (1.514) | 0.235 |
| Anemia | -0.164 (0.154) | 0.288 |
| Antiarrythmics | 0.455 (0.323) | 0.159 |
| Antibiotics | -0.440 (0.136) | 0.001 |
| Antiplatelets | -0.491 (0.246) | 0.046 |
| Ascites | 0.215 (0.255) | 0.401 |
| Autoimmune liver disease | 1.149 (0.350) | 0.001 |
| Beta blockers | 0.214 (0.151) | 0.155 |
| Black | 0.763 (0.360) | 0.034 |
| Budd-Chiari syndrome | -0.982 (1.025) | 0.338 |
| Cancer | -0.377 (0.156) | 0.016 |
| Calcium channel blockers | -0.638 (0.220) | 0.004 |
| Chads Vasc categoryA: >=6 | -0.027 (0.314) | 0.930 |
| Chads Vasc category: 4-5 | 0.211 (0.211) | 0.247 |
| Chads Vasc category: <4 | 0 (reference) | -- |
| Chronic unspecified liver failure | 1.191 (0.322) | 0.000 |
| Chronic viral hepatitis | -0.203 (0.226) | 0.369 |
| Cirrhosis complications | -0.129 (0.299) | 0.666 |
| Chronic kidney disease | 2.711 (0.179) | <.0001 |
| Coagulation defects | 0.864 (0.199) | <.0001 |
| Combined scoreB category: >=10 | 0.085 (0.291) | 0.769 |
| Combined score category: 8-9 | 0.280 (0.263) | 0.334 |
| Combined score category: 4-7 | 0.290 (0.211) | 0.338 |
| Combined score category: <4 | 0 (reference) | -- |
| Chronic obstructive pulmonary disease | -0.265 (0.157) | 0.092 |
| Coronary revascularization | -1.038 (0.644) | 0.107 |
| Dabigatran | 0.821 (0.867) | 0.343 |
| Dementia | 0.149 (0.235) | 0.525 |
| Depression | -0.158 (0.154) | 0.307 |
| Dialysis | 5.361 (0.342) | <.0001 |
| Dorsopathies | -0.017 (0.164) | 0.917 |
| Drug use disorder | -0.323 (0.240) | 0.179 |
| Deep vein thrombosis | -0.703 (0.207) | 0.001 |
| Electrocardiogram | 0.371 (0.214) | 0.083 |
| Esophageal varices (any) | -0.412 (0.315) | 0.190 |
| Esophageal varices with bleeding | -0.725 (0.372) | 0.051 |
| End stage renal disease | 5.008 (0.369) | <.0001 |
| Falls | 0.234 (0.180) | 0.193 |
| Female | -0.905 (0.148) | <.0001 |
| Flu vaccine | -0.076 (0.151) | 0.613 |
| Foot ulcer | 0.642 (0.281) | 0.023 |
| Frailty categoryC: >=0.34 | -0.066 (0.427) | 0.876 |
| Frailty category: 0.25-0.34 | -0.114 (0.310) | 0.661 |
| Frailty category: 0.15-0.24 | 0.082 (0.233) | 0.865 |
| Frailty category: <0.15 | 0 (reference) | -- |
| Gastric varices | -1.052 (0.791) | 0.184 |
| Gastroesophageal reflux disease | -0.198 (0.220) | 0.369 |
| Glaucoma and cataracts | -0.029 (0.218) | 0.891 |
| H2 receptor antagonists | -0.331 (0.147) | 0.024 |
| Heart failure | -0.393 (0.250) | 0.116 |
| Hemochromatosis | 0.184 (0.191) | 0.335 |
| Hepatic fibrosis and/or sclerosis | 0.345 (0.497) | 0.487 |
| Hyperosmolar nonketotic coma | 0.306 (0.490) | 0.532 |
| Hyperkalemia | 0.627 (0.309) | 0.043 |
| Hyperlipidemia | -0.857 (0.723) | 0.236 |
| Hypoglycemia | 0.307 (0.191) | 0.108 |
| Intracranial bleed | -0.282 (0.146) | 0.054 |
| Insulin | 0.236 (0.159) | 0.139 |
| Number of inpatient days: >=30 | -0.502 (0.381) | 0.188 |
| Number of inpatient days: 5-29 | -0.354 (0.267) | 0.185 |
| Number of inpatient days: <5 | 0 (reference) | -- |
| Ischemic heart disease | -0.329 (0.339) | 0.333 |
| Ischemic stroke | 0.483 (0.268) | 0.086 |
| Joint back pain | 0.278 (0.162) | 0.087 |
| Kidney transplant | -0.248 (0.210) | 0.237 |
| Laser photocoagulation and vitrectomy | -0.217 (0.172) | 0.207 |
| Late effects of cerebrovascular disease | 0.640 (0.599) | 0.286 |
| Liver transplantation | 0.955 (1.526) | 0.532 |
| Loop diuretics | -0.324 (0.271) | 0.231 |
| Lower extremity amputations | 0.304 (0.495) | 0.538 |
| Lower gastrointestinal bleed | 0.397 (0.163) | 0.015 |
| Major bleed | 0.190 (0.171) | 0.266 |
| Number of emergency department visits: >=4 | 0.252 (0.284) | 0.375 |
| Number of emergency department visits: 2-3 | 0 (reference) | -- |
| Number of emergency department visits: 1 | 0.413 (0.277) | 0.136 |
| Number of emergency department visits: 0 | 0.349 (0.235) | 0.999 |
| Number of inpatient visits: >=3 | 0.413 (0.228) | 0.738 |
| Number of inpatient visits: 2 | 0 (reference) | -- |
| Number of inpatient visits: 1 | -1.157 (0.398) | 0.004 |
| Number of inpatient visits: 0 | -0.898 (0.367) | 0.011 |
| Number of liver function tests: >=9 | -0.541 (0.300) | 0.212 |
| Number of liver function tests: 4-8 | 0 (reference) | -- |
| Number of liver function tests: 2-3 | 0.678 (0.219) | 0.002 |
| Number of liver function tests: <2 | 0.422 (0.195) | 0.021 |
| Number of office visits: >=15 | 0.204 (0.192) | 0.162 |
| Number of office visits: 10-14 | 0 (reference) | -- |
| Number of office visits: 5-9 | -0.194 (0.223) | 0.383 |
| Number of office visits: <5 | -0.009 (0.213) | 0.043 |
| Non-insulin antidiabetic medications | 0.180 (0.186) | 0.336 |
| Nonselective beta blockers | -0.208 (0.204) | 0.307 |
| Non-steroidal anti-inflammatory drugs (NSAIDs) | 0.430 (0.226) | 0.058 |
| Obesity | -0.242 (0.222) | 0.276 |
| Opioids | -0.203 (0.189) | 0.284 |
| Pulmonary embolism | -0.474 (0.150) | 0.002 |
| Peptic ulcer disease | -0.387 (0.279) | 0.166 |
| Portal hypertension | -0.257 (0.230) | 0.263 |
| Portal vein thrombosis | 0.529 (0.256) | 0.039 |
| Proton pump inhibitors | -0.187 (0.139) | 0.180 |
| Primary liver cancer | -0.196 (0.274) | 0.475 |
| Peripheral vascular disease | 0.148 (0.173) | 0.390 |
| Rifaximin | 0.579 (0.469) | 0.218 |
| Rivaroxaban | -0.689 (0.554) | 0.214 |
| Surgical aortic valve replacement | -1.668 (0.683) | 0.015 |
| Second unspecified cirrhosis | -0.863 (0.510) | 0.091 |
| Sleep apnea | -0.154 (0.231) | 0.504 |
| Smoking | -0.305 (0.156) | 0.051 |
| Skilled nursing facility days: >=3 | 0.222 (0.179) | 0.216 |
| Skilled nursing facility days: <3 | 0 (reference) | -- |
| Spironolactone | 0.851 (0.211) | <.0001 |
| Transcatheter aortic valve replacement | -1.178 (0.932) | 0.207 |
| Type 1 diabetes mellitus | -0.473 (0.249) | 0.058 |
| Type 2 diabetes mellitus | 0.269 (0.189) | 0.156 |
| Urgent endoscopy for variceal bleeding | -0.575 (0.558) | 0.303 |
| Upper endoscopy | 0.569 (0.178) | 0.001 |
| Upper gastrointestinal bleed | 0.284 (0.485) | 0.557 |
| Warfarin | 5.266 (0.187) | <.0001 |
| Wilson's disease | 4.592 (1.924) | 0.017 |

N, number; SD, standard deviation; MELD, model for end-stage liver disease

*The model created to predict continuous MELD score was subsequently used to create the binary categories of (a) predicted MELD<10 vs. >=10, and (b) predicted MELD<15 vs. >=15. For details, see Methods.

ACHADS-Vasc score is a risk score for predicting stroke in patients with atrial fibrillation, and includes age, sex, history of congestive heart failure, hypertension, prior stroke or transient ischemic attack, history of vascular disease and history of diabetes1.

BThe burden of comorbidity was quantified using a combined comorbidity score2.

CFrailty was measured using a claims-based frailty index (CFI) validated in the Medicare population3-6.

**Table S6: Selected Variables and Coefficients for the Final Logistic Regression Model for Prediction of MELD>=20:**

| **Predictors** | **Coefficients (S.E.)** | **P value** |
| --- | --- | --- |
| Intercept | 0.985 (0.199) | <.0001 |
| Abdominal ultrasound | 0.173 (0.060) | 0.004 |
| ACE inhibitors | -0.070 (0.062) | 0.259 |
| Acute kidney injury | 0.136 (0.067) | 0.043 |
| Atrial fibrillation | 0.190 (0.073) | 0.010 |
| Alcohol liver disease | 0.107 (0.094) | 0.256 |
| Antibiotics | -0.129 (0.057) | 0.026 |
| Beta blockers | 0.155 (0.065) | 0.017 |
| Chronic unspecified liver failure | 0.322 (0.122) | 0.008 |
| Chronic kidney disease | 0.600 (0.070) | <.0001 |
| Coagulation defects | 0.154 (0.070) | 0.028 |
| Dialysis | 1.311 (0.109) | <.0001 |
| End stage renal disease | 1.223 (0.111) | <.0001 |
| Female | -0.266 (0.059) | <.0001 |
| Gastroesophageal reflux disease | -0.036 (0.091) | 0.694 |
| Heart failure | 0.039 (0.068) | 0.566 |
| Hepatic encephalopathy | 0.025 (0.114) | 0.825 |
| Hyperkalemia | 0.056 (0.070) | 0.420 |
| Hyperlipidemia | -0.158 (0.062) | 0.012 |
| Hypoglycemia | 0.066 (0.061) | 0.276 |
| Non-insulin antidiabetic medications | -0.134 (0.076) | 0.081 |
| Opioids | -0.172 (0.067) | 0.010 |
| Peptic ulcer disease | -0.010 (0.092) | 0.282 |
| Peripheral artery disease | 0.055 (0.064) | 0.388 |
| Skilled nursing facility days: >=3 | 0.113 (0.063) | 0.074 |
| Spironolactone | 0.196 (0.075) | 0.010 |
| Upper endoscopy | 0.110 (0.069) | 0.114 |
| Warfarin | 1.031 (0.071) | <.0001 |

N, number; SD, standard deviation; MELD, model for end-stage liver disease

**Table S7. Odds of All-Cause Mortality at 180 Days According to Predicted MELD and Measured MELD Scores, in Patients with Cirrhosis**

| *Medicare Training Set* |  |  |
| --- | --- | --- |
| **MELD Category** | **Predicted MELD** | **Measured MELD** |
| - <10 | 1 (reference) | 1 (reference) |
| - 10 to <20 | 1.39 (1.16-1.66) | 1.36 (1.13-1.63) |
| - >=20 | 2.65 (2.07-3.40) | 2.46 (2.00-3.04) |
|  |  |  |
| *Medicare Validation Set* |  |  |
| **MELD Category** | **Predicted MELD** | **Measured MELD** |
| - <10 | 1 (reference) | 1 (reference) |
| - 10 to <20 | 1.46 (1.16-1.83) | 1.32 (1.05-1.67) |
| - >=20 | 1.60 (1.12-2.27) | 1.70 (1.28-2.27) |

Abbreviations: MELD, model for end-stage liver disease

For cohort construction, model development and MELD calculation, see Methods.

**Table S8. Comparison between models with vs. without including age as a candidate predictor**

| **MELD category** | **Model** | **AUC in Medicare Training Set** | **AUC in Medicare Validation set** | **AUC in Medicare Validation Set** |
| --- | --- | --- | --- | --- |
| <10 | With age | 0.86 | 0.84 | 0.78 |
| Without Age | 0.86 | 0.84 | 0.78 |
| >=15 | With age | 0.91 | 0.90 | 0.85 |
| Without Age | 0.91 | 0.90 | 0.85 |
| >=20 | With age | 0.93 | 0.93 | 0.88 |
| Without Age | 0.93 | 0.93 | 0.88 |

Abbreviations: MELD, model for end-stage liver disease; AUC, area under the receiver operating characteristic

For cohort construction, model development and MELD calculation, see Methods.

**Supplementary References:**

1. Lip GY, Nieuwlaat R, Pisters R, et al. Refining clinical risk stratification for predicting stroke and thromboembolism in atrial fibrillation using a novel risk factor-based approach: the euro heart survey on atrial fibrillation. *Chest* 2010;137(2):263-72. doi: 10.1378/chest.09-1584 [published Online First: 2009/09/19]

2. Gagne JJ, Glynn RJ, Avorn J, et al. A combined comorbidity score predicted mortality in elderly patients better than existing scores. *J Clin Epidemiol* 2011;64(7):749-59. doi: 10.1016/j.jclinepi.2010.10.004 [published Online First: 2011/01/07]

3. Kim DH, Schneeweiss S, Glynn RJ, et al. Measuring Frailty in Medicare Data: Development and Validation of a Claims-Based Frailty Index. *J Gerontol A Biol Sci Med Sci* 2018;73(7):980-87. doi: 10.1093/gerona/glx229 [published Online First: 2017/12/16]

4. Kim DH, Glynn RJ, Avorn J, et al. Validation of a Claims-Based Frailty Index Against Physical Performance and Adverse Health Outcomes in the Health and Retirement Study. *J Gerontol A Biol Sci Med Sci* 2019;74(8):1271-76. doi: 10.1093/gerona/gly197 [published Online First: 2018/08/31]

5. Kim DH, Patorno E, Pawar A, et al. Measuring Frailty in Administrative Claims Data: Comparative Performance of Four Claims-Based Frailty Measures in the U.S. Medicare Data. *J Gerontol A Biol Sci Med Sci* 2020;75(6):1120-25. doi: 10.1093/gerona/glz224 [published Online First: 2019/10/01]

6. Gautam N, Bessette L, Pawar A, et al. Updating International Classification of Diseases 9th Revision to 10th Revision of a Claims-Based Frailty Index. *J Gerontol A Biol Sci Med Sci* 2021;76(7):1316-17. doi: 10.1093/gerona/glaa150 [published Online First: 2020/06/13]
